# Supplementary material for: Discovery of highly potent triazoleantifungal agents with piperidine-oxadiazole side chains
Source: Royal Society of Chemistry journal article supplement (doi:10.1039/c4md00505h), 2014-12-24
Supplement: c4md00505h1.pdf [file c4md00505h1.pdf]

## Supplementary Material

### **Discovery of Highly Potent Triazole Antifungal Agents with Piperdine-oxadiazole Side Chains**

Xiaomeng He<sup>§</sup>, Yan Jiang<sup>§</sup>, Yongqiang Zhang, Shanchao Wu, Guoqiang Dong, Na Liu, Yang Liu, Jianzhong Yao, Zhenyuan Miao, Yan Wang\*, Wannian Zhang\* and Chunquan Sheng\*

*School of Pharmacy, Second Military Medical University, 325 Guohe Road, Shanghai  
200433, China*

<sup>§</sup>These authors contributed equally to this work.

\* To whom correspondence should be addressed. For C. Sheng: Phone/Fax, 86-21-81871239, E-mail, shengcq@hotmail.com. For W. Zhang: Phone/Fax, 86-21-81870243, E-mail, zhangwnk@hotmail.com. For Y. Wang: Phone/Fax, 86-21-81871359, E-mail, wangyansmmu@126.com.

# Representative <sup>1</sup>H NMR spectra for the target compounds

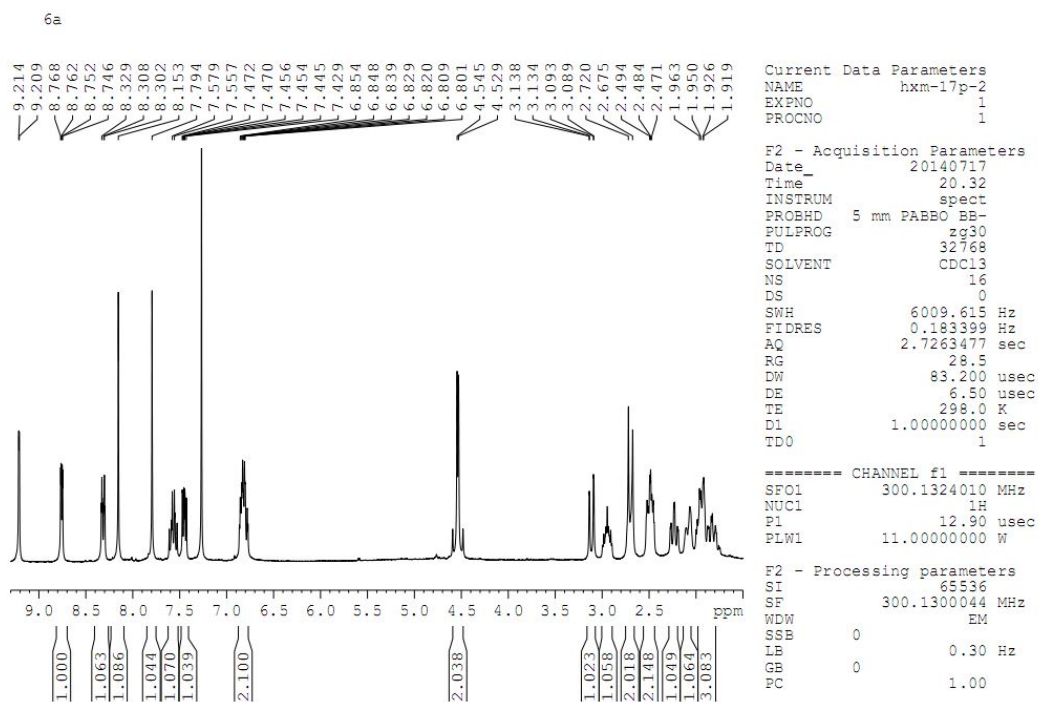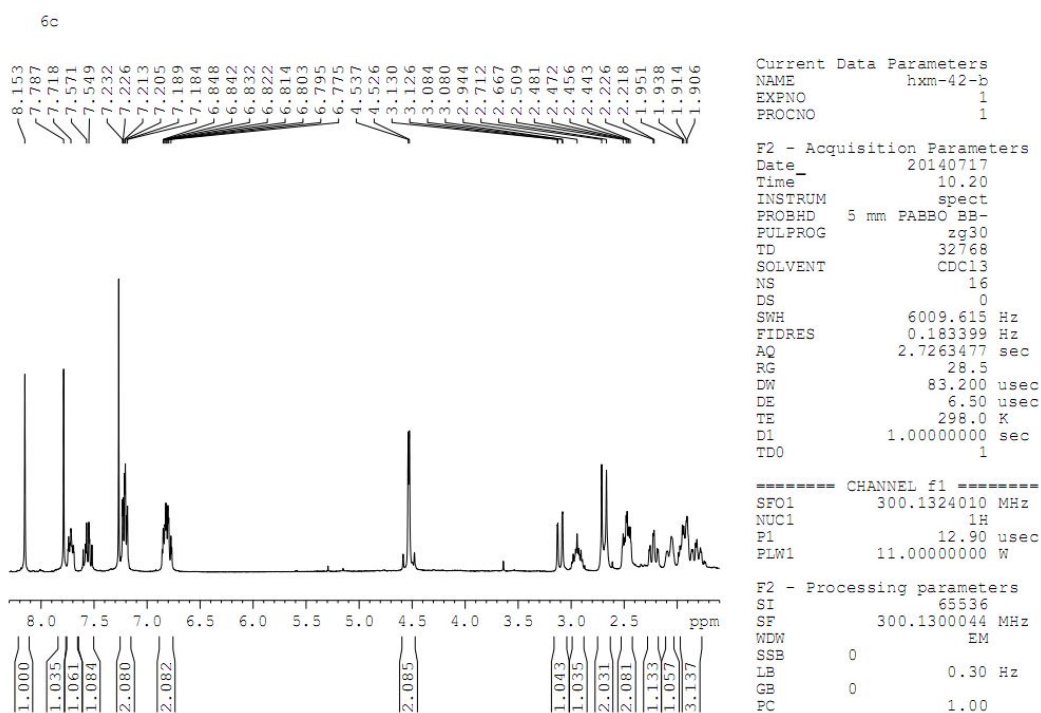

6d

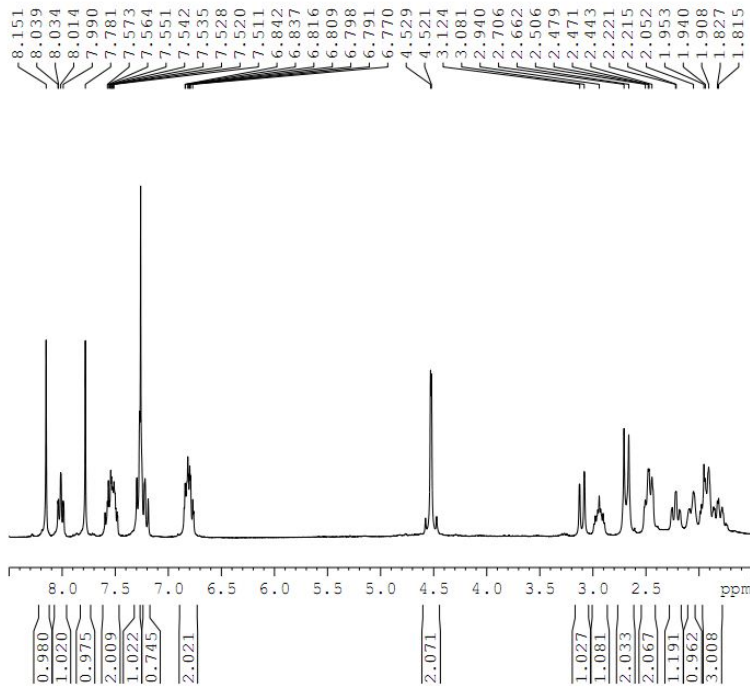

Current Data Parameters  
 NAME hxm-46a  
 EXPNO 1  
 PROCNO 1

F2 - Acquisition Parameters  
 Date\_ 20140716  
 Time 16.33  
 INSTRUM spect  
 PROBHD 5 mm PABBO BB-  
 PULPROG zg30  
 TD 32768  
 SOLVENT CDC13  
 NS 16  
 DS 0  
 SWH 6009.615 Hz  
 FIDRES 0.183399 Hz  
 AQ 2.7263477 sec  
 RG 28.5  
 DW 83.200 usec  
 DE 6.50 usec  
 TE 298.0 K  
 D1 1.00000000 sec  
 TD0 1

==== CHANNEL f1 =====  
 SFO1 300.1324010 MHz  
 NUC1 1H  
 P1 12.90 usec  
 PLW1 11.00000000 W

F2 - Processing parameters  
 SI 65536  
 SF 300.1300062 MHz  
 WDW EM  
 SSB 0  
 LB 0.30 Hz  
 GB 0  
 PC 1.00

6e

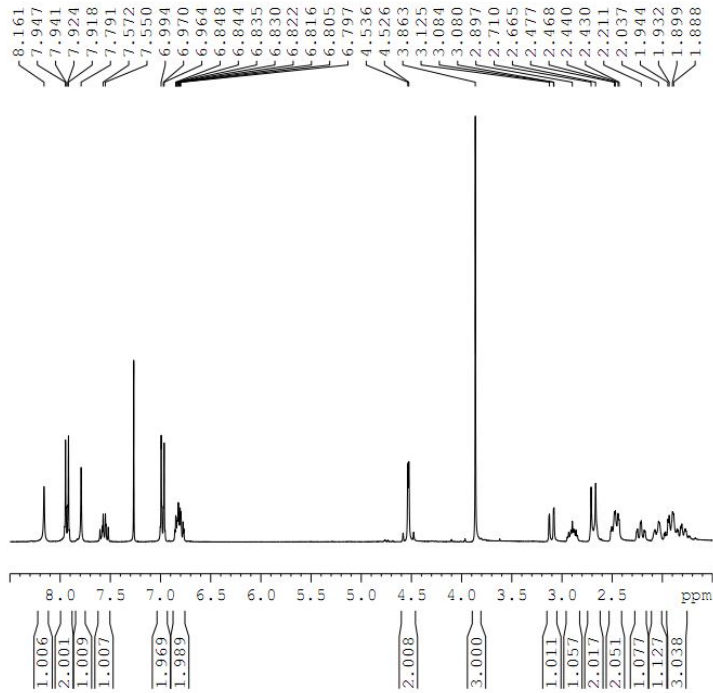

Current Data Parameters  
 NAME hxm-50A  
 EXPNO 1  
 PROCNO 1

F2 - Acquisition Parameters  
 Date\_ 20140717  
 Time 16.55  
 INSTRUM spect  
 PROBHD 5 mm PABBO BB-  
 PULPROG zg30  
 TD 32768  
 SOLVENT CDC13  
 NS 16  
 DS 0  
 SWH 6009.615 Hz  
 FIDRES 0.183399 Hz  
 AQ 2.7263477 sec  
 RG 28.5  
 DW 83.200 usec  
 DE 6.50 usec  
 TE 298.0 K  
 D1 1.00000000 sec  
 TD0 1

==== CHANNEL f1 =====  
 SFO1 300.1324010 MHz  
 NUC1 1H  
 P1 12.90 usec  
 PLW1 11.00000000 W

F2 - Processing parameters  
 SI 65536  
 SF 300.1300044 MHz  
 WDW EM  
 SSB 0  
 LB 0.30 Hz  
 GB 0  
 PC 1.00

6h

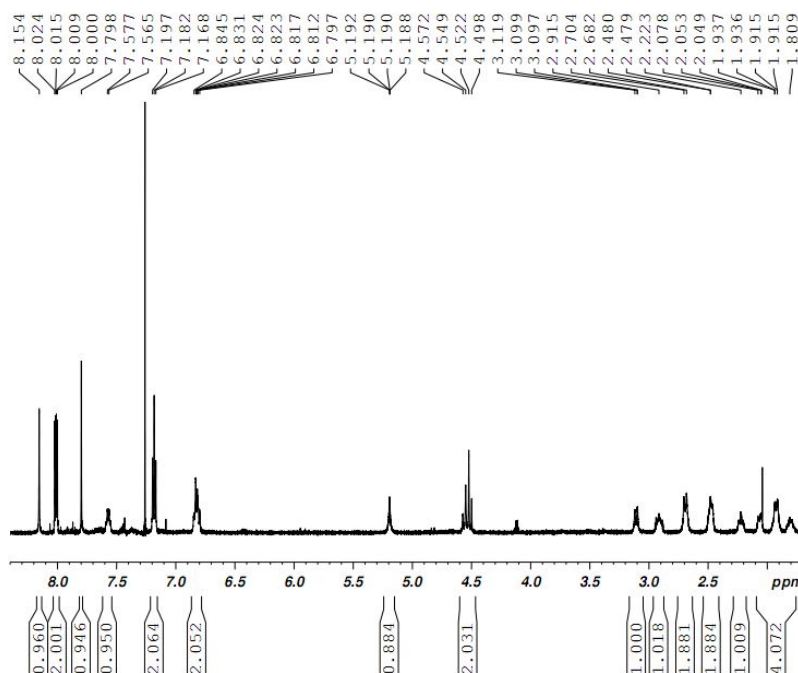

Current Data Parameters  
NAME hxm-62-3-0  
EXPNO 1  
PROCNO 1

F2 - Acquisition Parameters  
Date\_ 20140410  
Time 10.33  
INSTRUM spect  
PROBHD 5 mm PABBO BB-  
PULPROG zg30  
TD 65536  
SOLVENT CDC13  
NS 16  
DS 0  
SWH 9615.385 Hz  
FIDRES 0.146719 Hz  
AQ 3.4079220 sec  
RG 144  
DW 52.000 usec  
DE 6.50 usec  
TE 295.2 K  
D1 1.00000000 sec  
TDO 1

===== CHANNEL f1 =====  
SFO1 600.1335000 MHz  
NUC1 1H  
P1 13.70 usec  
PLW1 19.34000015 W

F2 - Processing parameters  
SI 65536  
SF 600.1300162 MHz  
WDW EM  
SSB 0  
LB -0.20 Hz  
GB 0  
PC 1.00

6j

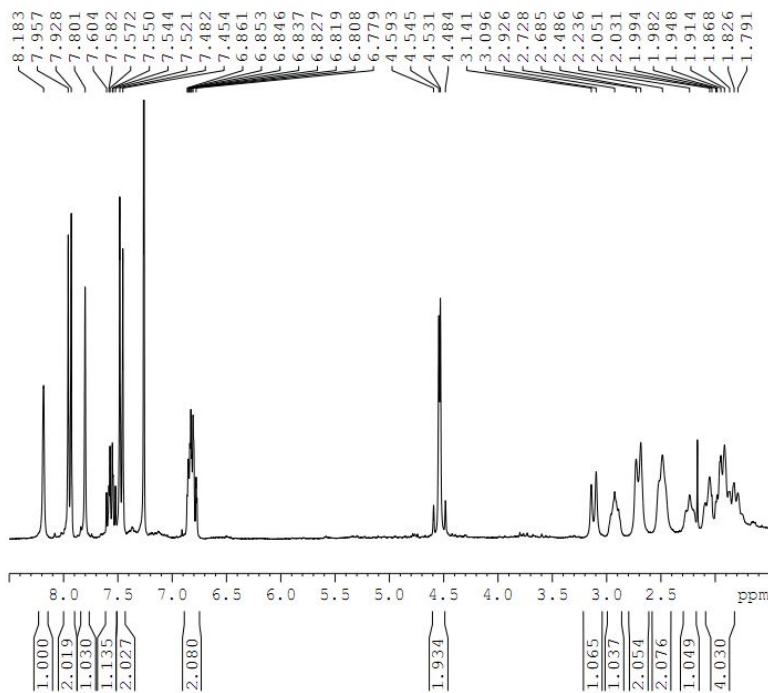

Current Data Parameters  
NAME hxm-94-1  
EXPNO 1  
PROCNO 1

F2 - Acquisition Parameters  
Date\_ 20140520  
Time 16.49  
INSTRUM spect  
PROBHD 5 mm PABBO BB-  
PULPROG zg30  
TD 32768  
SOLVENT CDC13  
NS 128  
DS 0  
SWH 6009.615 Hz  
FIDRES 0.183399 Hz  
AQ 2.7263477 sec  
RG 45.2  
DW 83.200 usec  
DE 6.50 usec  
TE 298.0 K  
D1 1.00000000 sec  
TDO 1

===== CHANNEL f1 =====  
SFO1 300.1318320 MHz  
NUC1 1H  
P1 12.90 usec  
PLW1 11.00000000 W

F2 - Processing parameters  
SI 65536  
SF 300.1300066 MHz  
WDW EM  
SSB 0  
LB 0.30 Hz  
GB 0  
PC 1.00

60

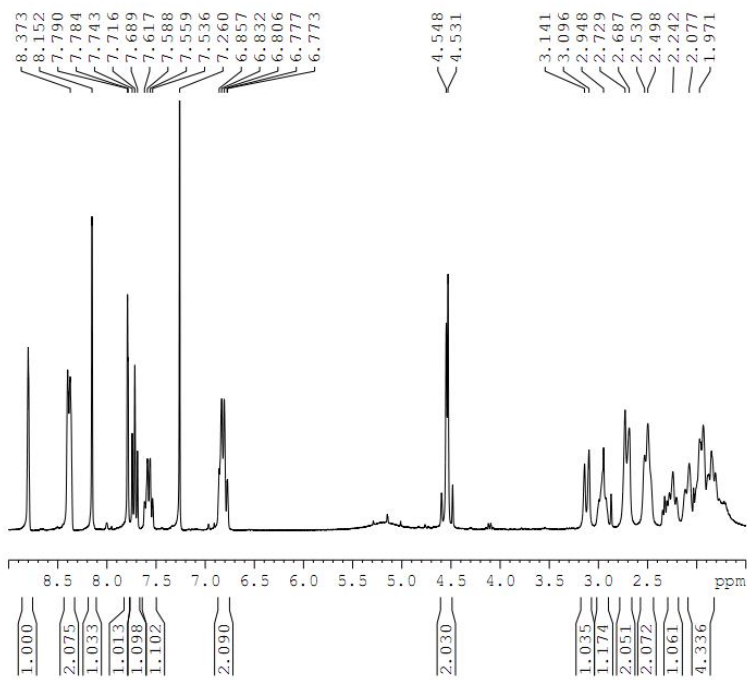

Current Data Parameters  
 NAME hxm-97-2  
 EXPNO 1  
 PROCNO 1

F2 - Acquisition Parameters  
 Date\_ 20140610  
 Time\_ 14.51  
 INSTRUM spect  
 PROBHD 5 mm PABBO BB-  
 PULPROG zg30  
 TD 32768  
 SOLVENT CDCl3  
 NS 16  
 DS 0  
 SWH 6009.615 Hz  
 FIDRES 0.183399 Hz  
 AQ 2.7263477 sec  
 RG 28.5  
 DW 83.200 usec  
 DE 6.50 usec  
 TE 298.0 K  
 D1 1.00000000 sec  
 TDO 1

===== CHANNEL f1 =====  
 SFO1 300.1324010 MHz  
 NUC1 1H  
 P1 12.90 usec  
 PLW1 11.00000000 W

F2 - Processing parameters  
 SI 65536  
 SF 300.1300066 MHz  
 WDW EM  
 SSB 0  
 LB 0.30 Hz  
 GB 0  
 FC 1.00

11b

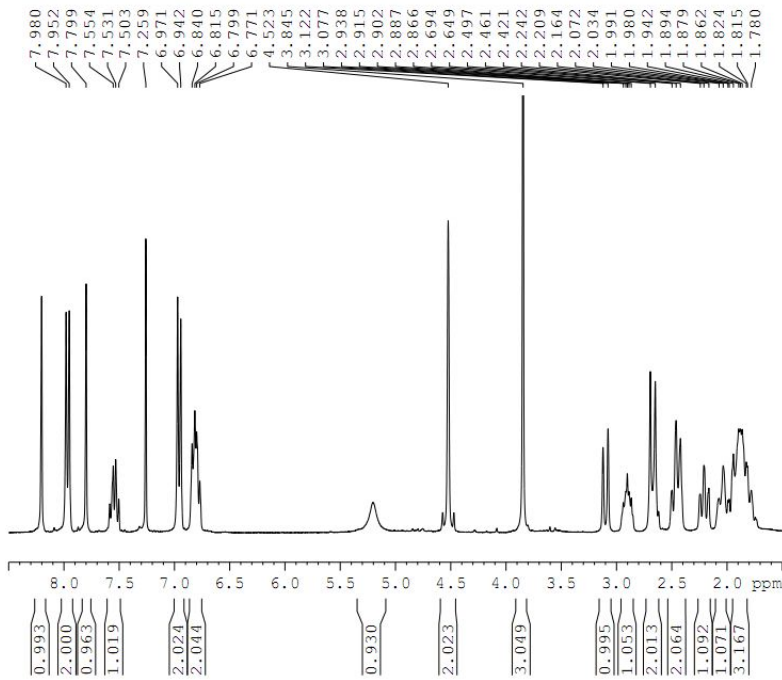

Current Data Parameters  
 NAME hxm-70-1  
 EXPNO 11  
 PROCNO 1

F2 - Acquisition Parameters  
 Date\_ 20140718  
 Time\_ 9.24  
 INSTRUM spect  
 PROBHD 5 mm PABBO BB-  
 PULPROG zg30  
 TD 32768  
 SOLVENT CDCl3  
 NS 16  
 DS 0  
 SWH 6009.615 Hz  
 FIDRES 0.183399 Hz  
 AQ 2.7263477 sec  
 RG 28.5  
 DW 83.200 usec  
 DE 6.50 usec  
 TE 298.0 K  
 D1 1.00000000 sec  
 TDO 1

===== CHANNEL f1 =====  
 SFO1 300.1324010 MHz  
 NUC1 1H  
 P1 12.90 usec  
 PLW1 11.00000000 W

F2 - Processing parameters  
 SI 65536  
 SF 300.1300072 MHz  
 WDW EM  
 SSB 0  
 LB 0.30 Hz  
 GB 0  
 FC 1.00

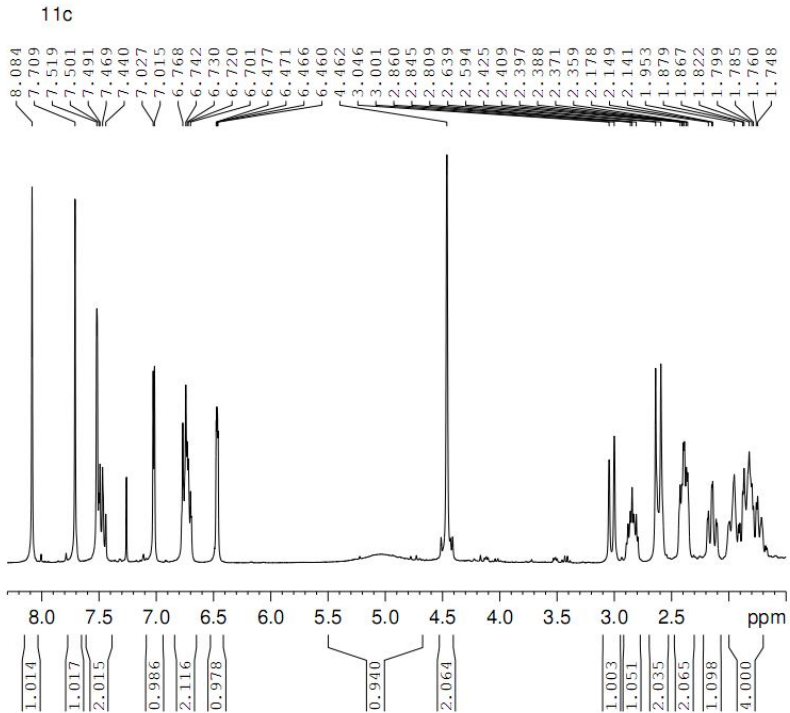

Current Data Parameters  
 NAME hxm-118  
 EXPNO 1  
 PROCNO 1

F2 - Acquisition Parameters  
 Date\_ 20140719  
 Time 17.32  
 INSTRUM spect  
 PROBHD 5 mm PABBO BB-  
 PULPROG zg30  
 TD 32768  
 SOLVENT CDCl3  
 NS 16  
 DS 0  
 SWH 6009.615 Hz  
 FIDRES 0.183399 Hz  
 AQ 2.7263477 sec  
 RG 28.5  
 DW 83.200 usec  
 DE 6.50 usec  
 TE 298.0 K  
 D1 1.00000000 sec  
 TD0 1

===== CHANNEL f1 =====  
 SFO1 300.1324010 MHz  
 NUC1 1H  
 P1 12.90 usec  
 PLW1 11.00000000 W

F2 - Processing parameters  
 SI 65536  
 SF 300.1300066 MHz  
 WDW EM  
 SSB 0  
 LB 0.30 Hz  
 GB 0  
 PC 1.00

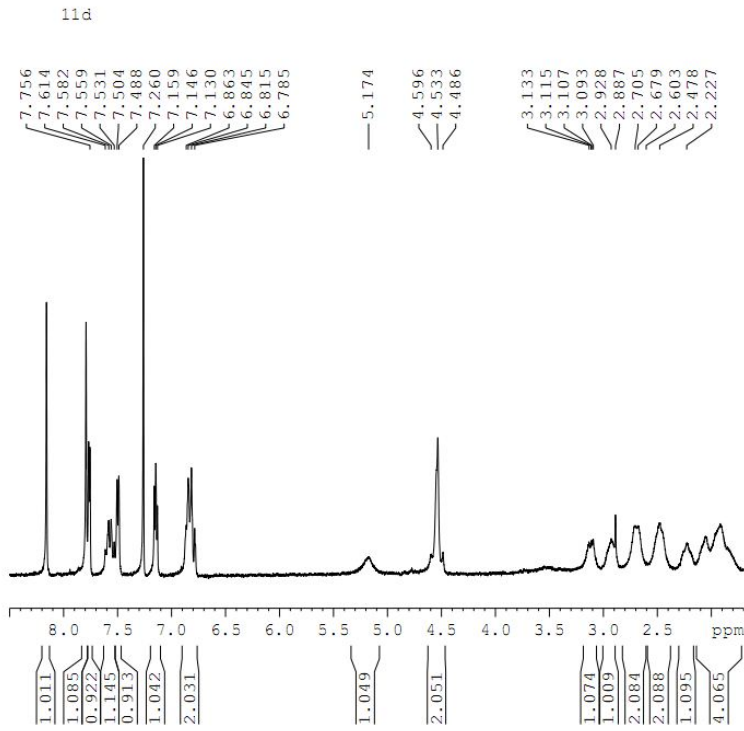

Current Data Parameters  
 NAME hxm-105a  
 EXPNO 1  
 PROCNO 1

F2 - Acquisition Parameters  
 Date\_ 20140610  
 Time 14.55  
 INSTRUM spect  
 PROBHD 5 mm PABBO BB-  
 PULPROG zg30  
 TD 32768  
 SOLVENT CDCl3  
 NS 16  
 DS 0  
 SWH 6009.615 Hz  
 FIDRES 0.183399 Hz  
 AQ 2.7263477 sec  
 RG 28.5  
 DW 83.200 usec  
 DE 6.50 usec  
 TE 298.0 K  
 D1 1.00000000 sec  
 TD0 1

===== CHANNEL f1 =====  
 SFO1 300.1324010 MHz  
 NUC1 1H  
 P1 12.90 usec  
 PLW1 11.00000000 W

F2 - Processing parameters  
 SI 65536  
 SF 300.1300067 MHz  
 WDW EM  
 SSB 0  
 LB 0.30 Hz  
 GB 0  
 PC 1.00

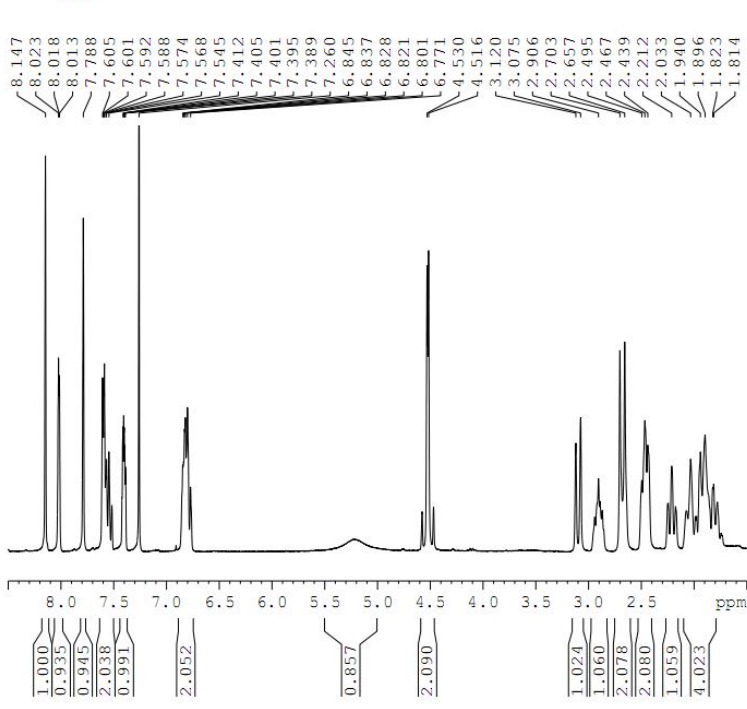

Current Data Parameters  
 NAME hxm-105b  
 EXPNO 1  
 PROCNO 1

F2 - Acquisition Parameters  
 Date 20140610  
 Time 14.43  
 INSTRUM spect  
 PROBHD 5 mm PABBO BB-  
 PULPROG zg30  
 TD 32768  
 SOLVENT CDC13  
 NS 16  
 DS 0  
 SWH 6009.615 Hz  
 FIDRES 0.183399 Hz  
 AQ 2.7263477 sec  
 RG 28.5  
 DW 83.200 usec  
 DE 6.50 usec  
 TE 298.0 K  
 D1 1.00000000 sec  
 TD0 1

----- CHANNEL f1 -----  
 SFO1 300.1324010 MHz  
 NUC1 1H  
 P1 12.90 usec  
 PLW1 11.00000000 W

F2 - Processing parameters  
 SI 65536  
 SF 300.1300067 MHz  
 WDW EM  
 SSB 0  
 LB 0.30 Hz  
 GB 0  
 FC 1.00

# Determination of the purity of target compounds by HPLC analysis. Representative data was provided for compound 11b.

Data File D:\CHEM32\1\DATA\HXM\201409000051.D  
 Sample Name: 70-1

```

=====
Acq. Operator   : hxm
Acq. Instrument : HPLC1260
Injection Date  : 9/28/2014 8:12:23 PM
Location       : -
Inj Volume     : Manually

Acq. Method    : D:\CHEM32\1\DATA\HXM\201409000049.D\RUN.M
Last changed   : 9/28/2014 2:32:18 PM by hxm
Analysis Method: D:\CHEM32\1\DATA\HYH\201409000062.D\RUN.M
Last changed   : 9/28/2014 9:09:13 PM by hxm
Method Info    : MeOH/H2O=70:30,254nm,0.8ml/min,460*250MM

Sample Info    : CH3OH/H2O=78/22 254nm, 1ml/min
                  C18 460*250MM
  
```

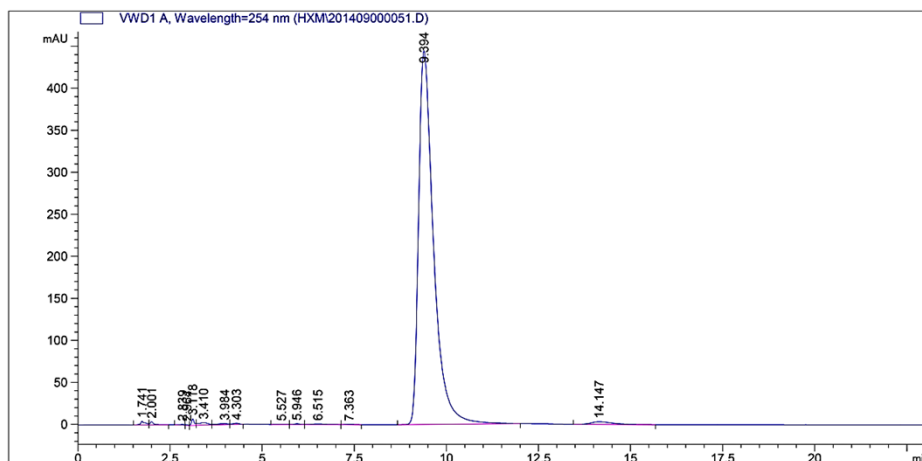

## Area Percent Report

```

=====
Sorted By      : Signal
Multiplier:    : 1.0000
Dilution:      : 1.0000
Sample Amount: : 1.00000 [ng/ul] (not used in calc.)
Use Multiplier & Dilution Factor with ISTDs
  
```

Signal 1: VWD1 A, Wavelength=254 nm

| Peak # | RetTime [min] | Type | Width [min] | Area [mAU*s] | Height [mAU] | Area % |
|--------|---------------|------|-------------|--------------|--------------|--------|
| 1      | 1.741         | BV   | 0.1090      | 36.69029     | 4.46422      | 0.2843 |
| 2      | 2.001         | VB   | 0.0922      | 24.27445     | 3.79013      | 0.1881 |
| 3      | 2.839         | BV   | 0.1169      | 7.09739      | 8.45329e-1   | 0.0550 |
| 4      | 2.964         | VB   | 0.0775      | 4.24229      | 8.45386e-1   | 0.0329 |

HPLC1260 11/7/2014 11:10:29 AM hyh

Page 1 of 2

|    |        |    |        |           |            |         |
|----|--------|----|--------|-----------|------------|---------|
| 5  | 3.118  | BV | 0.0693 | 37.93463  | 8.07766    | 0.2940  |
| 6  | 3.410  | VV | 0.2672 | 53.70966  | 2.91793    | 0.4162  |
| 7  | 3.984  | VV | 0.3029 | 27.80171  | 1.19122    | 0.2154  |
| 8  | 4.303  | VB | 0.1705 | 16.53780  | 1.42304    | 0.1282  |
| 9  | 5.527  | BV | 0.2908 | 3.65873   | 1.95762e-1 | 0.0284  |
| 10 | 5.946  | VV | 0.1659 | 8.34250   | 7.59918e-1 | 0.0646  |
| 11 | 6.515  | VB | 0.3889 | 16.40956  | 6.05643e-1 | 0.1272  |
| 12 | 7.363  | BB | 0.2212 | 4.01097   | 2.82065e-1 | 0.0311  |
| 13 | 9.394  | BB | 0.4233 | 1.25316e4 | 444.89804  | 97.1083 |
| 14 | 14.147 | BB | 0.6030 | 132.45390 | 3.26435    | 1.0264  |

Totals : 1.29048e4 473.56069

\*\*\* End of Report \*\*\*
